# Supplementary material
Source: publisher site journal article supplement (https://www.dovepress.com/article/252433)
Supplement: Supplementary file 1 [file get_supplementary_file.php]

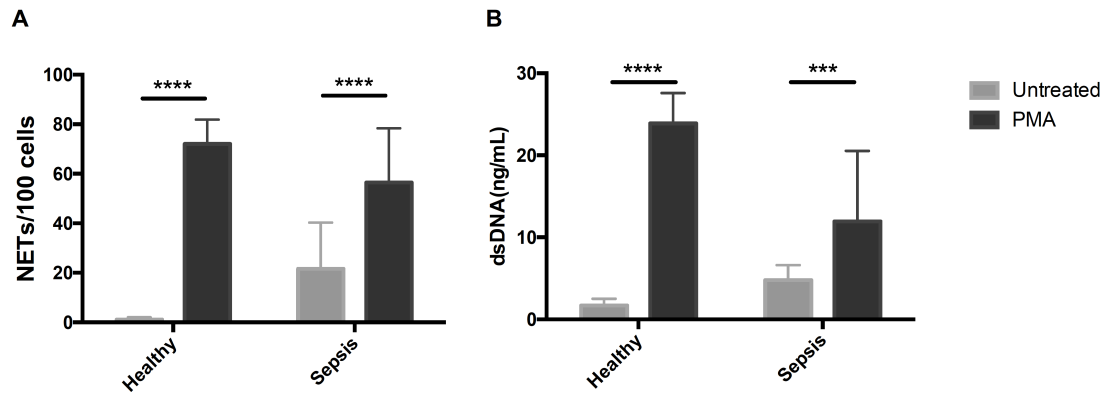

**Supplementary Figure 1.** Effect of phorbol myristate acetate (PMA; 600nM) on NET formation. NETs counted per 100 neutrophils (n=5 for both groups) (A), the levels of dsDNA (B) from patients with sepsis and healthy controls (n=5 for both groups) (\*\*\*\* p< 0.0001, \*\*\* p< 0.001).

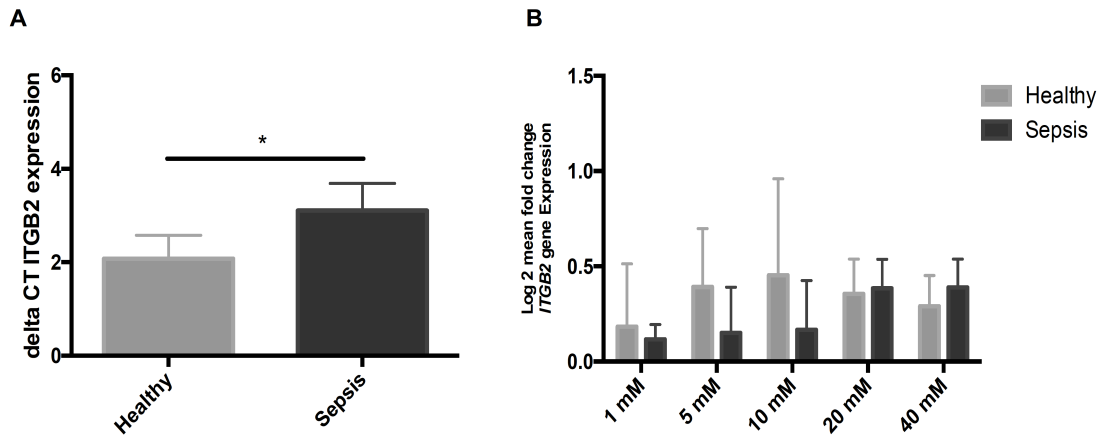

**Supplementary Figure 2.** The *ITGB2* mRNA expression (A) of isolated neutrophils from patients with sepsis and healthy controls (n=5 for both groups), and (B) cells treated with different concentrations of ascorbate (1, 5, 10, 20 and 40 mM) for 2h (\* p< 0.05).

Supplementary Table 1. Detailed information of patients with sepsis

| Patient No.                    | 1        | 2        | 3        | 4    | 5        | 6        | 7    | 8    | 9    | 10   | 11   | 12       | 13   | 14       | 15   | 16   | 17   | 18    | 19     | 20       |
|--------------------------------|----------|----------|----------|------|----------|----------|------|------|------|------|------|----------|------|----------|------|------|------|-------|--------|----------|
| Gender                         | M        | F        | F        | F    | F        | F        | F    | M    | F    | M    | M    | M        | M    | M        | M    | F    | F    | M     | M      | M        |
| Age                            | 65       | 65       | 60       | 27   | 63       | 34       | 66   | 64   | 61   | 60   | 65   | 60       | 39   | 60       | 67   | 70   | 72   | 62    | 63     | 78       |
| Source of infection            | GI tract | GI tract | GI tract | RS   | GI tract | GI tract | RS   | RS   | Skin | Skin | RS   | GI tract | CNS  | GU tract | RS   | RS   | RS   | RS    | Skin   | GI Tract |
| BUN (mg/dL)                    | 52       | 91       | 18       | 9    | 51       | 15       | 14   | 44   | 56   | 62   | 71   | 34       | 91   | 102      | 20   | 64   | 2.26 | 1.18  | 0.72   | 51       |
| Cr (mg/dL)                     | 3.52     | 5.01     | 0.71     | 0.72 | 2.03     | 1.96     | 1.69 | 2.15 | 1.54 | 1.28 | 2.12 | 2.95     | 3.7  | 3.08     | 1.82 | 3.49 | 21.5 | 66.5  | 109.81 | 3.54     |
| TB (mg/dL)                     | 0.43     | 0.6      | 0.87     | NA   | 33.52    | 1.64     | 0.74 | 0.51 | 0.72 | 2.19 | 0.47 | 12.55    | 3.16 | 16.41    | 0.65 | 0.74 | 0.29 | 1.39  | 1.42   | 0.84     |
| DB (mg/dL)                     | 0.33     | 0.49     | 0.61     | NA   | 23.68    | 0.82     | 0.41 | 0.38 | 0.32 | 1.71 | 0.19 | 8.2      | 2.51 | 11.18    | 0.29 | 0.53 | 51   | 71    | 47     | 0.55     |
| SGOT (U/L)                     | 31       | 50       | 46       | NA   | 14       | 1417     | 2199 | 33   | 87   | 36   | 29   | 1590     | 155  | 103      | 55   | 29   | 41   | 32    | 52     | 49       |
| SGPT (U/L)                     | 34       | 56       | 70       | NA   | 2        | 632      | 1047 | 29   | 87   | 27   | 33   | 816      | 139  | 8        | 14   | 13   | 74   | 168   | 36     | 26       |
| ALP (U/L)                      | 265      | 452      | 372      | NA   | 147      | 72       | 95   | 90   | 68   | 94   | 123  | 443      | 157  | 384      | 244  | 72   | 140  | 141   | 135    | 117      |
| Na (mmol/L)                    | 137      | 141      | 146      | 134  | 138      | 148      | 133  | 131  | 141  | 143  | 145  | 134      | 143  | 132      | 133  | 142  | 4.3  | 3.5   | 3.1    | 146      |
| K (mmol/L)                     | 3.5      | 4.3      | 3.5      | 3.5  | 3.1      | 3.9      | 4    | 5    | 4    | 3.8  | 4.3  | 3.3      | 4.6  | 4.8      | 3.5  | 3.5  | 106  | 116   | 109    | 3.6      |
| Cl (mmol/L)                    | 108      | 107      | 111      | 106  | 96       | 95       | 87   | 95   | 101  | 112  | 110  | 98       | 113  | 96       | 102  | 102  | 25   | 11    | 18     | 106      |
| CO <sub>2</sub> (mmol/L)       | 17       | 17       | 15       | 21   | 18       | 17       | 23   | 24   | 20   | 19   | 21   | 22       | 19   | 13       | 17   | 21   | 235  | 78    | 7      | 19       |
| Platelet (10 <sup>3</sup> /uL) | 299      | 234      | 55       | 286  | 82       | 95       | 204  | 230  | 146  | 39   | 117  | 61       | 558  | 43       | 140  | 284  | 8.25 | 18.18 | 0.19   | 55       |
| SOFA score                     | 11       | 13       | 12       | 5    | 16       | 11       | 9    | 4    | 2    | 8    | 10   | 18       | 10   | 15       | 10   | 4    | 10   | 8     | 8      | 12       |

**Abbreviations:** GI; gastrointestinal, RS; respiratory system, CNS; central nervous system, GU; genitourinary, and SOFA; Sequential Sepsis-Related Organ Failure Assessment, SD; standard deviation, N/A; not applicable
